# Supplementary material for: Urinary cell microRNA-based prognostic classifier for non-muscle invasive bladder cancer
Source: PubMed Central journal article supplement (PMC5392323; doi:10.18632/oncotarget.15315), 2017-02-14
Supplement: oncotarget-08-18238-s001.pdf [file oncotarget-08-18238-s001.pdf]

## Urinary cell microRNA-based prognostic classifier for non-muscle invasive bladder cancer

### SUPPLEMENTARY FIGURE AND TABLES

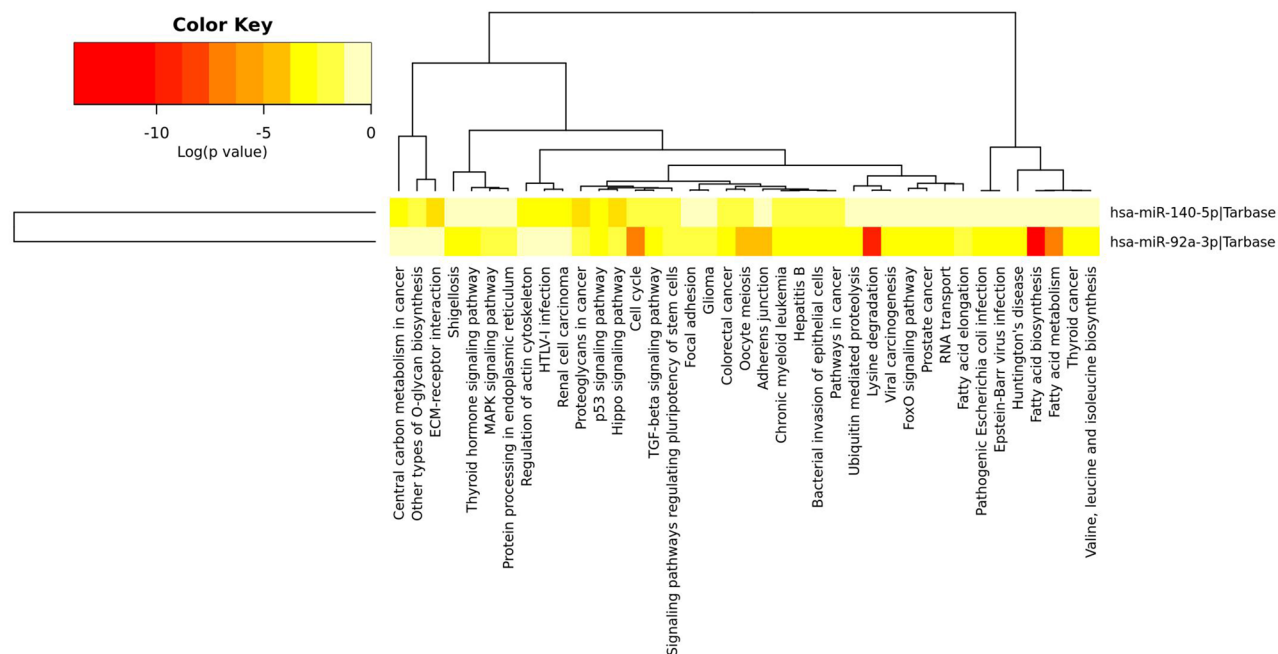

**Supplementary Figure 1: Heatmap of the KEGG pathways enriched in two miRNA target genes.** Heatmap from union of targeted genes (genes targeted by at least one selected miRNAs) is shown. The two miRNAs from the signature are involved in multiple common pathways, especially in cancer-specific pathways (DIANA-miRpath computes  $\log_{10}$  P-values).

**Supplementary Table 1: Fold change values for the miRNAs between the groups in the previous and present study**

| miRNA           | Mengual et al, 2013 [13]                    |                |                                     |                | Present study                       |                |
|-----------------|---------------------------------------------|----------------|-------------------------------------|----------------|-------------------------------------|----------------|
|                 | Overall diagnostic performance <sup>a</sup> |                | Prognostic performance <sup>b</sup> |                | Prognostic performance <sup>c</sup> |                |
|                 | FC <sup>†</sup>                             | P <sup>‡</sup> | FC <sup>†</sup>                     | P <sup>‡</sup> | FC <sup>†</sup>                     | P <sup>‡</sup> |
| hsa-miR-18a-3p  | 2.02                                        | 0.162          | 3.26                                | 0.002          | 1.64                                | 0.002          |
| hsa-miR-92a-3p  | 1.98                                        | 0.024          | 3.60                                | 0.001          | 1.77                                | 0.012          |
| hsa-miR-140-5p  | -2.94                                       | 0.011          | -1.24                               | 0.034          | 1.67                                | 0.071          |
| hsa-miR-125b-5p | -3.39                                       | 0.029          | -5.60                               | 0.048          | -2.57                               | 0.010          |
| hsa-miR-142-3p  | -4.37                                       | 0.003          | 1.16                                | 0.055          | 2.23                                | 0.073          |
| hsa-miR-204-5p  | -2.47                                       | 0.323          | -6.04                               | 0.379          | -2.08                               | 0.128          |

<sup>†</sup> Fold change (FC) differences of the miRNA expression between BC and control urines<sup>a</sup>, high and low grade BC tumour urines<sup>b</sup> and urines from progressing and non-progressing patients<sup>c</sup>. FC values were generated from the median expression of the miRNAs from LNA<sup>TM</sup> real-time RT-qPCR in the groups compared.

<sup>‡</sup> Student's t test P values.

**Supplementary Table 2: Exiqon identification number for the LNA primers used in this study**

| <b>miRNA</b>    | <b>Exiqon ID</b> |
|-----------------|------------------|
| hsa-miR-25-3p   | 204361           |
| hsa-miR-18a-3p  | 204523           |
| hsa-miR-92a-3p  | 204258           |
| hsa-miR-140-5p  | 204540           |
| hsa-miR-142-3p  | 204291           |
| hsa-miR-125b-5p | 205713           |
| hsa-miR-204-5p  | 206072           |
| hsa-miR-187-3p  | 204018           |
